# Supplementary material for: Interleukin-31 expression and relation to disease severity in human asthma
Source: PubMed Central journal article supplement (PMC4783779; doi:10.1038/srep22835), 2016-03-09
Supplement: srep22835-s1.pdf [file srep22835-s1.pdf]

**Title page**

**Interleukin-31 expression and relation to disease severity in human asthma**

Tianwen Lai<sup>1†</sup>; Dong Wu<sup>1†</sup>; Wen Li<sup>1†</sup>; Min Chen<sup>1</sup>; Zhennan Yi<sup>1</sup>; Dan Huang<sup>1</sup>; Zhiliang Jing<sup>2</sup>; Yingying Li<sup>1</sup>; Quanchao Lv<sup>1</sup>; Dongming Li<sup>1\*</sup>; Bin Wu<sup>1\*</sup>

1. Department of Respiratory and Critical Care Medicine, Affiliated Hospital, Institute of Respiratory Diseases, Guangdong Medicine College, Zhanjiang, China.

2. Department of pathology, Affiliated Hospital, Guangdong Medicine College, Zhanjiang, China.

<sup>†</sup>Equal contributors

\*Correspondence to Bin Wu or Dongming Li. Email: wubin621011@126.com or 1335887835@qq.com.

Tel: 86-759-2387-413; Fax; 86-571-8778-3729

## Supplementary information

**Supplemental Fig. 1** Patients were stratified two groups according to the percentage of peripheral blood eosinophils: patients with Eos > 5% group (n = 19) and patients with Eos ≤ 5% group (n = 25). There were no significantly difference between two groups (median [range], 133.5 [95.7-173.5] pg/ml vs 104.9 [46.7-155.0] pg/ml, p = 0.0941).

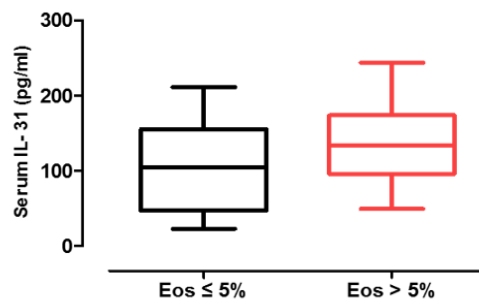

Supplemental Fig. 1
